# Supplementary material for: Coupling laser ablation/desorption electrospray ionization to atmospheric pressure drift tube ion mobility spectrometry for the screening of antimalarial drug quality
Source: Royal Society of Chemistry journal article supplement (doi:10.1039/c2an35431d), 2012-01-01
Supplement: c2an35431d.pdf [file c2an35431d.pdf]

Supplementary information for “Coupling Laser Ablation/Desorption Electrospray Ionization to Atmospheric Pressure Drift Tube Ion Mobility Spectrometry for the Screening of Antimalarial Drug Quality”

By, Harris, Glenn A. *et al.*

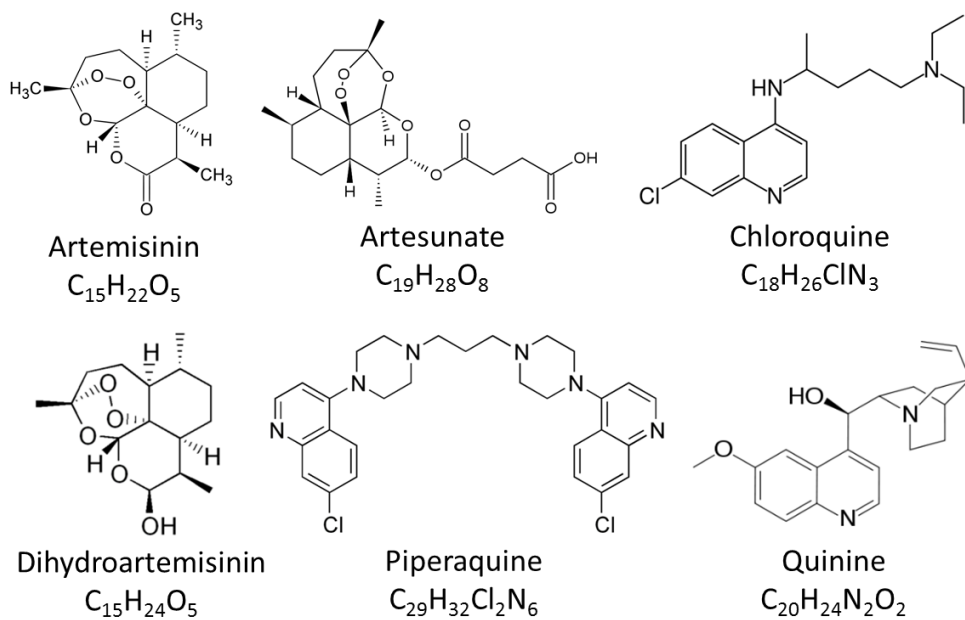

**Supplementary Figure S1:** Structures and molecular formulas of the six active pharmaceutical ingredients (APIs) encountered in this study.

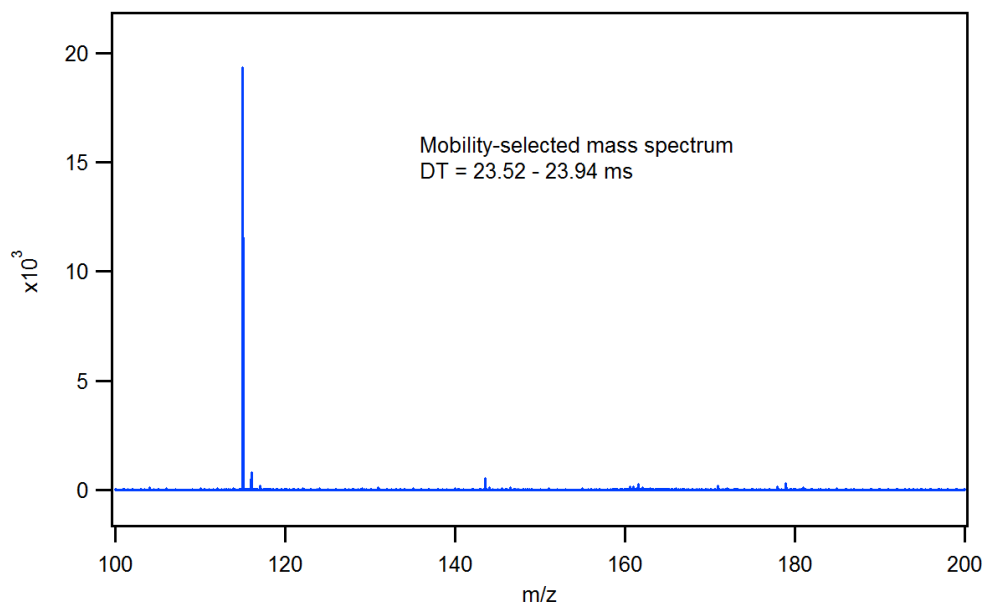

**Supplementary Figure S2:** Extracted mass spectrum at drift time  $t_d = 23.8$  ms (peak iii) of tablet number three containing chloroquine.

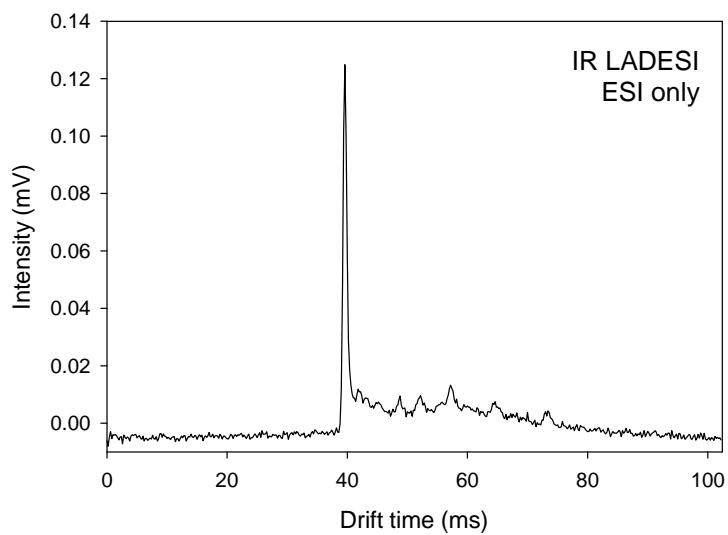

**Supplementary Figure S3:** Typical ion mobility background spectrum of LADESI electrospray solvent.
